# Supplementary material
Source: HighWire-hosted journal article supplement (https://srh.bmj.com/content/49/4/260)
Supplement: inline-supplementary-material-1 [file inline-supplementary-material-1.pdf]

## Supplementary Material

### Supplementary Figure S1: Participant flow diagram showing selection and inclusion in study

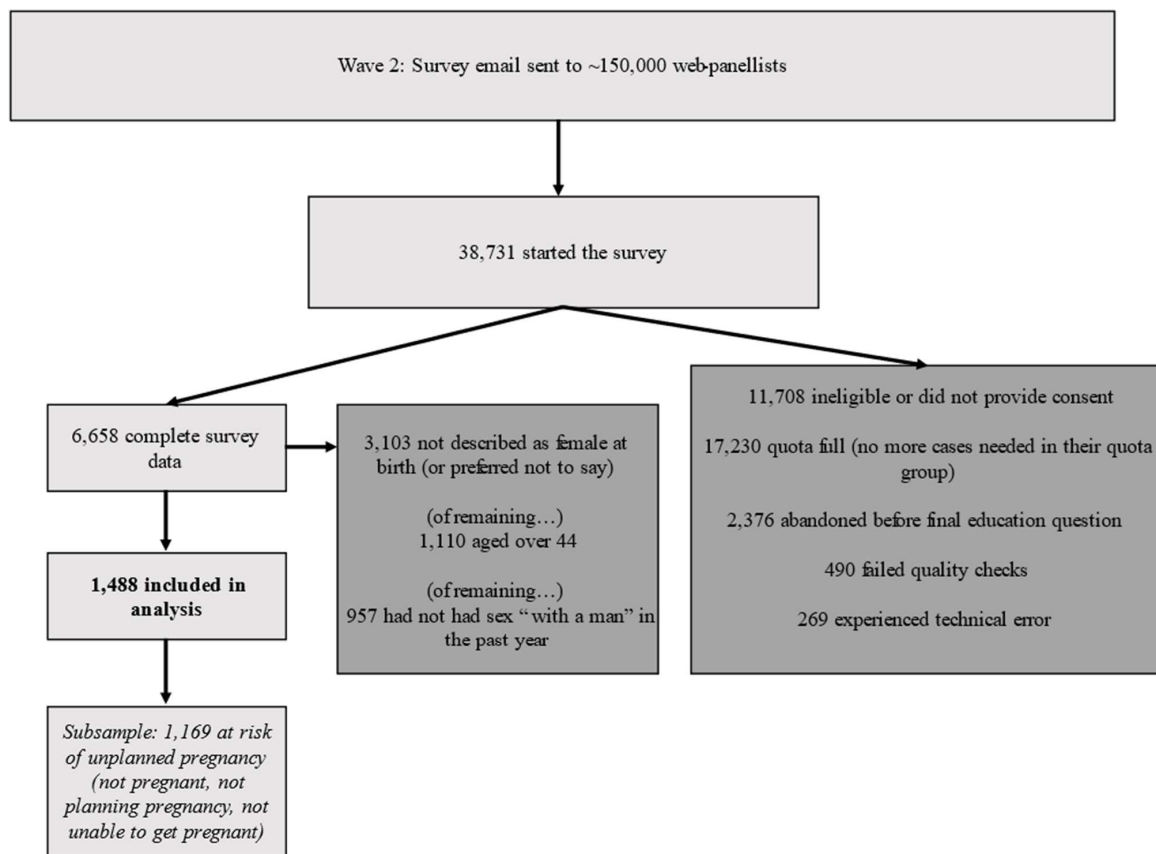

Adapted from Dema, et al., 2022: **Methodology of Natsal-COVID Wave 2: A large, quasi-representative, longitudinal survey measuring the impact of COVID-19 on sexual and reproductive health in Britain** [version 1; peer review: awaiting peer review] (<https://wellcomeopenresearch.org/articles/7-166/v1>), Figure 1

## Supplementary Figure S2: Accessing contraception services

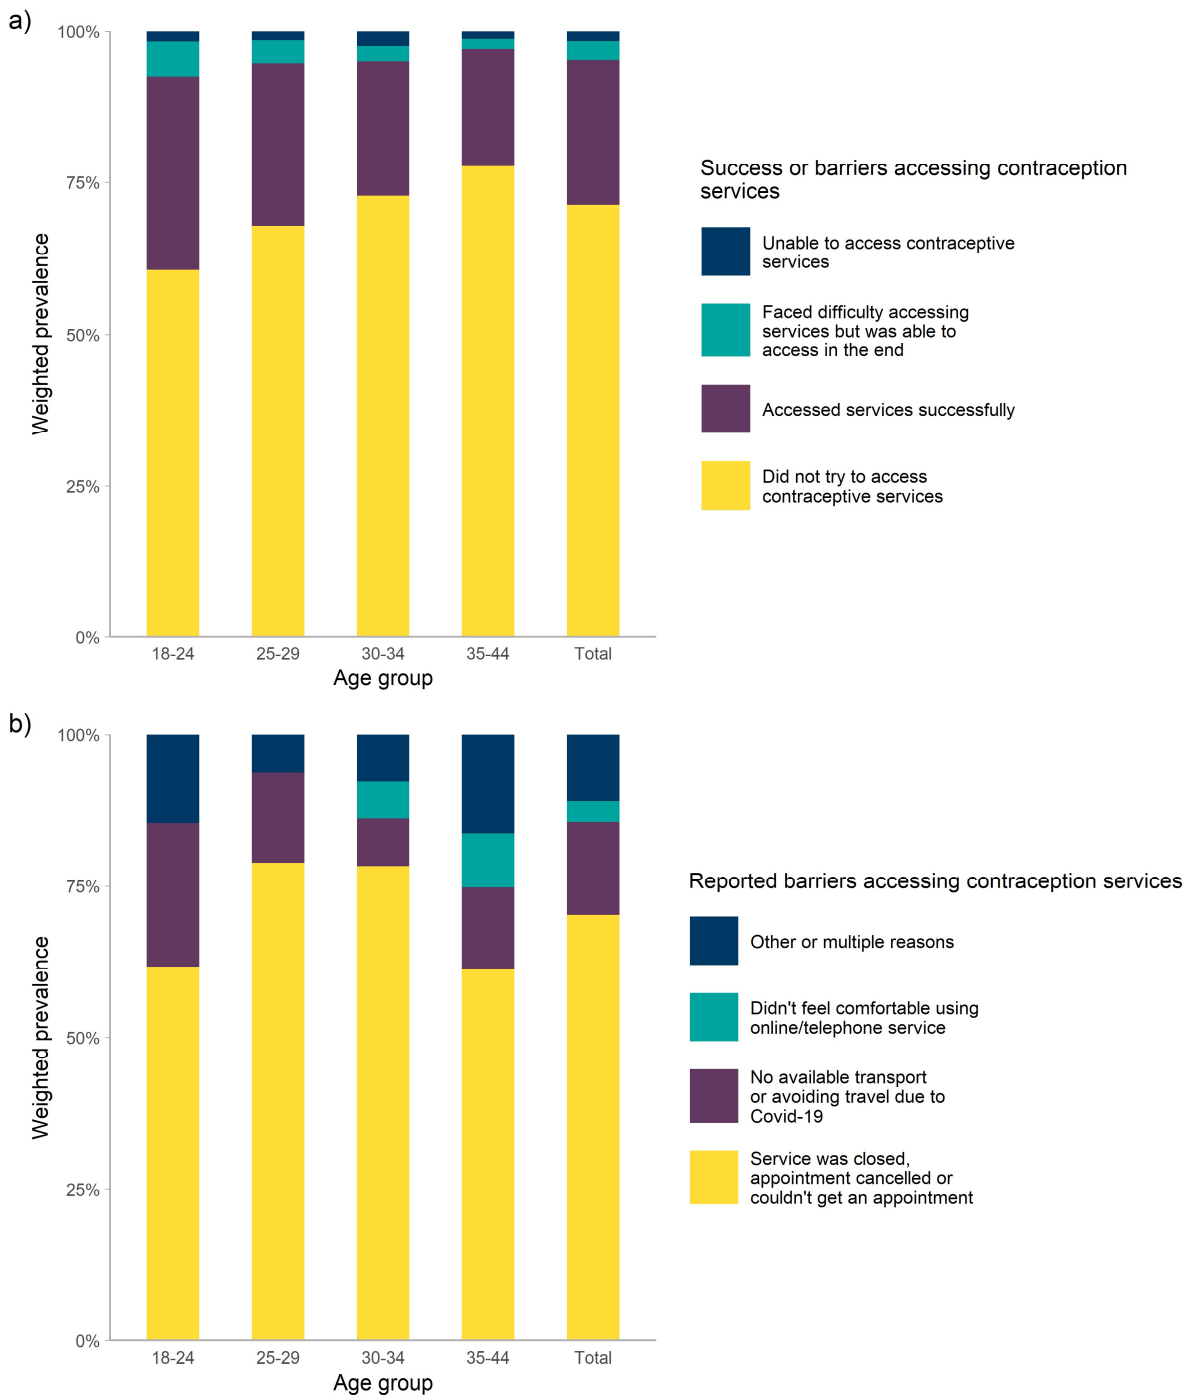

## Supplementary Box 1 – Classifications of contraceptive types

Participants' responses to questions of contraceptives used were classified into 'more effective' and 'less effective' types by typical use failure rates below and above 10% respectively. Emergency methods were categorised separately.

### More effective methods:

|                           |                         |
|---------------------------|-------------------------|
| Intrauterine device (IUD) | Oral contraceptive pill |
| Intrauterine system (IUS) | Injection               |
| Implant                   | Transdermal patch       |
| Vaginal ring              |                         |

### Less effective methods:

|               |                 |
|---------------|-----------------|
| Condoms       | Withdrawal      |
| Spermicides   | 'Other' methods |
| Rhythm method |                 |

### Emergency methods:

|                               |                         |
|-------------------------------|-------------------------|
| Emergency contraceptive pills | Emergency IUD insertion |
|-------------------------------|-------------------------|

## Supplementary Table S1: Socio-demographic characteristics of sexually active participants aged 18-44 years, described as female at birth who reported sex with a man in the past year

| Age group                                                  | 18-24                | 25-29                | 30-34                | 35-44                | All ages              |
|------------------------------------------------------------|----------------------|----------------------|----------------------|----------------------|-----------------------|
| <b>Total</b>                                               |                      |                      |                      |                      |                       |
| Distribution across age categories (% (95% CI))            | 16.7<br>(15.3, 18.1) | 25.3<br>(23.7, 27.1) | 21.3<br>(19.7, 22.9) | 36.7<br>(34.9, 38.6) | 100.0%                |
| Denominators (weighted, unweighted)                        | 213, 265             | 324, 397             | 272, 320             | 470, 506             | 1279, 1488            |
| <b>Distributions within age categories</b>                 |                      |                      |                      |                      |                       |
|                                                            | <b>% (95% CI)</b>    | <b>% (95% CI)</b>    | <b>% (95% CI)</b>    | <b>% (95% CI)</b>    | <b>% (95% CI)</b>     |
| <b>Ethnicity</b>                                           |                      |                      |                      |                      |                       |
| White                                                      | 79.0<br>(72.9, 84.0) | 86.0<br>(81.8, 89.4) | 86.4<br>(81.8, 90.0) | 90.8<br>(87.8, 93.1) | 86.7%<br>(84.7, 88.5) |
| Black or Black African or Black Caribbean or Black British | 9.4 (6.1, 14.3)      | 5.4 (3.4, 8.5)       | 1.6 (0.6, 4.1)       | 0.8 (0.3, 2.2)       | 3.6% (2.7, 4.7)       |
| Asian or Asian British                                     | 8.0 (5.0, 12.5)      | 4.2 (2.5, 7.1)       | 7.7 (5.1, 11.6)      | 6.0 (4.2, 8.6)       | 6.2% (5.0, 7.7)       |
| Mixed or multiple or other ethnic groups                   | 3.6 (1.8, 7.2)       | 4.4 (2.6, 7.2)       | 4.2 (2.4, 7.4)       | 2.4 (1.3, 4.2)       | 3.5% (2.6, 4.6)       |
| Missing: n=10 (0.7%)                                       |                      |                      |                      |                      |                       |
| <b>Self-described sexual identity</b>                      |                      |                      |                      |                      |                       |
| Heterosexual or Straight                                   | 92.4<br>(88.0, 95.3) | 96.1<br>(93.3, 97.7) | 97.7<br>(95.0, 98.9) | 98.5<br>(96.9, 99.3) | 96.7%<br>(95.5, 97.5) |
| Lesbian, Gay, Bisexual or Other                            | 7.6 (4.7, 12.0)      | 3.9 (2.3, 6.7)       | 2.3 (1.1, 5.0)       | 1.5 (0.7, 3.1)       | 3.3% (2.5, 4.5)       |
| Missing: n=12 (0.8%)                                       |                      |                      |                      |                      |                       |
| <b>Social Grade</b>                                        |                      |                      |                      |                      |                       |

| Age group                                                                                                    | 18-24                | 25-29                | 30-34                | 35-44                | All ages              |
|--------------------------------------------------------------------------------------------------------------|----------------------|----------------------|----------------------|----------------------|-----------------------|
| A/B - Higher/intermediate managerial, administrative and professional                                        | 17.6<br>(13.0, 23.3) | 29.8<br>(25.1, 35.0) | 23.7<br>(19.0, 29.2) | 19.6<br>(16.2, 23.4) | 22.7%<br>(20.5, 25.1) |
| C1/C2 - Supervisory, clerical and junior managerial, administrative and professional, skilled manual workers | 39.3<br>(32.9, 46.0) | 49.1<br>(43.7, 54.6) | 50.3<br>(44.3, 56.2) | 61.4<br>(56.9, 65.7) | 52.3%<br>(49.5, 55.0) |
| D/E - Semi-skilled and unskilled manual, casual, lowest grade and unemployed                                 | 43.1<br>(36.6, 49.9) | 21.1<br>(16.9, 25.9) | 26.0<br>(21.1, 31.6) | 19.0<br>(15.7, 22.8) | 25.0%<br>(22.7, 27.4) |
| Missing: n=0 (0%)                                                                                            |                      |                      |                      |                      |                       |
| <b>Education level</b>                                                                                       |                      |                      |                      |                      |                       |
| Degree                                                                                                       | 28.3<br>(22.6, 34.7) | 58.5<br>(53.1, 63.8) | 59.0<br>(53.1, 64.7) | 54.8<br>(50.2, 59.2) | 52.2%<br>(49.5, 55.0) |
| Below degree                                                                                                 | 65.1<br>(58.5, 71.3) | 36.7<br>(31.6, 42.1) | 37.2<br>(31.6, 43.1) | 43.4<br>(39.0, 47.9) | 44.0%<br>(41.3, 46.8) |
| No qualifications                                                                                            | 6.6 (3.9, 10.9)      | 4.7 (2.9, 7.7)       | 3.8 (2.1, 6.8)       | 1.8 (0.9, 3.5)       | 3.8% (2.8, 4.9)       |
| Missing: n=0 (0%)                                                                                            |                      |                      |                      |                      |                       |
| <b>Living together – relationship but not living together – Single</b>                                       |                      |                      |                      |                      |                       |
| Married/steady and living together                                                                           | 34.4 (28.3, 41.0)    | 71.0 (65.8, 75.7)    | 78.5 (73.2, 83.0)    | 82.2 (78.4, 85.4)    | 70.6% (68.0, 73.0)    |
| Married/steady NOT living together                                                                           | 29.2 (23.5, 35.7)    | 11.7 (8.6, 15.7)     | 7.7 (5.1, 11.6)      | 7.3 (5.3, 10.0)      | 12.1% (10.4, 14.0)    |
| Casual, new, >1, at end or other*                                                                            | 18.5 (13.8, 24.3)    | 7.7 (5.3, 11.2)      | 4.2 (2.4, 7.4)       | 3.8 (2.4, 6.0)       | 7.3% (6.0, 8.9)       |
| Single                                                                                                       | 17.9 (13.3, 23.7)    | 9.5 (6.8, 13.3)      | 9.6 (6.6, 13.7)      | 6.7 (4.8, 9.4)       | 9.9% (8.4, 11.7)      |
| Missing: n=1 (0.1%)                                                                                          |                      |                      |                      |                      |                       |

| Age group                                                         | 18-24                | 25-29                | 30-34                | 35-44                | All ages              |
|-------------------------------------------------------------------|----------------------|----------------------|----------------------|----------------------|-----------------------|
| <b>Been furloughed under the Coronavirus Job Retention Scheme</b> |                      |                      |                      |                      |                       |
| No                                                                | 82.8<br>(77.0, 87.3) | 85.5<br>(81.2, 88.9) | 81.0<br>(75.9, 85.3) | 83.1<br>(79.4, 86.2) | 83.2%<br>(81.0, 85.2) |
| Yes                                                               | 17.2<br>(12.7, 23.0) | 14.5<br>(11.1, 18.8) | 19.0<br>(14.7, 24.1) | 16.9<br>(13.8, 20.6) | 16.8%<br>(14.8, 19.0) |
| Missing: n=12 (0.8%)                                              |                      |                      |                      |                      |                       |
| <b>Became unemployed</b>                                          |                      |                      |                      |                      |                       |
| No                                                                | 86.2<br>(80.8, 90.3) | 92.4<br>(89.0, 94.9) | 91.9<br>(88.0, 94.6) | 91.9<br>(89.0, 94.1) | 91.1%<br>(89.4, 92.5) |
| Yes                                                               | 13.8<br>(9.7, 19.2)  | 7.6 (5.1, 11.0)      | 8.1 (5.4, 12.0)      | 8.1 (5.9, 11.0)      | 8.9%<br>(7.5, 10.6)   |
| Missing: n=12 (0.8%)                                              |                      |                      |                      |                      |                       |
| <b>Number of days drinking in past week</b>                       |                      |                      |                      |                      |                       |
| 0 days                                                            | 38.0<br>(31.7, 44.7) | 40.1<br>(34.9, 45.5) | 46.0<br>(40.2, 52.0) | 45.7<br>(41.2, 50.2) | 43.0%<br>(40.3, 45.8) |
| 1-2 days                                                          | 41.0<br>(34.6, 47.8) | 40.9<br>(35.6, 46.4) | 39.5<br>(33.9, 45.5) | 35.3<br>(31.1, 39.7) | 38.6%<br>(35.9, 41.3) |
| 3-4 days                                                          | 17.3<br>(12.8, 23.0) | 13.1<br>(9.8, 17.3)  | 9.5 (6.5, 13.7)      | 11.3<br>(8.7, 14.5)  | 12.4%<br>(10.7, 14.3) |
| 5-7 days                                                          | 3.7 (1.8, 7.2)       | 5.9 (3.8, 9.1)       | 4.9 (2.9, 8.2)       | 7.8 (5.7, 10.6)      | 6.0% (4.8, 7.5)       |
| Missing: n=2 (0.1%)                                               |                      |                      |                      |                      |                       |

| Age group                                                | 18-24                | 25-29                | 30-34                | 35-44                | All ages              |
|----------------------------------------------------------|----------------------|----------------------|----------------------|----------------------|-----------------------|
| <b>Drinking habits compared to pre Covid-19 outbreak</b> |                      |                      |                      |                      |                       |
| Less these days                                          | 36.9<br>(30.6, 43.6) | 30.9<br>(26.1, 36.2) | 28.8<br>(23.7, 34.6) | 25.8<br>(22.0, 30.0) | 29.6%<br>(27.1, 32.2) |
| About the same                                           | 40.7<br>(34.2, 47.4) | 51.6<br>(46.1, 57.1) | 57.2<br>(51.1, 63.0) | 56.9<br>(52.4, 61.4) | 52.9%<br>(50.1, 55.6) |
| More these days                                          | 22.4<br>(17.3, 28.6) | 17.5<br>(13.7, 22.0) | 14.0<br>(10.3, 18.7) | 17.3<br>(14.1, 21.0) | 17.5%<br>(15.5, 19.7) |
| Missing: n=19 (1.3%)                                     |                      |                      |                      |                      |                       |
| <b>Current smoker</b>                                    |                      |                      |                      |                      |                       |
| No                                                       | 75.9<br>(69.7, 81.2) | 73.4<br>(68.3, 77.9) | 79.8<br>(74.6, 84.2) | 82.3<br>(78.5, 85.5) | 78.5%<br>(76.1, 80.6) |
| Yes                                                      | 24.1<br>(18.8, 30.3) | 26.6<br>(22.1, 31.7) | 20.2<br>(15.8, 25.4) | 17.7<br>(14.5, 21.5) | 21.5%<br>(19.4, 23.9) |
| Missing: n=2 (0.1%)                                      |                      |                      |                      |                      |                       |
| <b>Symptoms of depression (PHQ2 score)</b>               |                      |                      |                      |                      |                       |
| No symptoms of depression (0-2)                          | 47.8<br>(41.0, 54.6) | 63.1<br>(57.6, 68.2) | 67.2<br>(61.3, 72.5) | 74.6<br>(70.4, 78.3) | 65.7%<br>(63.1, 68.3) |
| Symptoms of depression (3-6)                             | 52.2<br>(45.4, 59.0) | 36.9<br>(31.8, 42.4) | 32.8<br>(27.5, 38.7) | 25.4<br>(21.7, 29.6) | 34.3%<br>(31.7, 36.9) |
| Missing: n=15 (1.0%)                                     |                      |                      |                      |                      |                       |
| <b>Symptoms of anxiety (GAD2 score)</b>                  |                      |                      |                      |                      |                       |
| No symptoms of anxiety (0-2)                             | 46.4<br>(39.7, 53.3) | 58.3<br>(52.8, 63.5) | 63.7<br>(57.8, 69.2) | 69.4<br>(65.0, 73.4) | 61.6%<br>(58.9, 64.2) |

| Age group                 | 18-24                | 25-29                | 30-34                | 35-44                | All ages              |
|---------------------------|----------------------|----------------------|----------------------|----------------------|-----------------------|
| Symptoms of anxiety (3-6) | 53.6<br>(46.7, 60.3) | 41.7<br>(36.5, 47.2) | 36.3<br>(30.8, 42.2) | 30.6<br>(26.6, 35.0) | 38.4%<br>(35.8, 41.1) |

Missing: n=8 (0.5%)

\* In a 'casual' relationship, in a 'new' relationship, in more than one relationship, recently ended a relationship or 'other' relationship status

## Supplementary Table S2: Definitions of outcome variables

| Outcome/Variable                                            | Denominator                              | Definition                                                                                                                                                                                                                                                                        |
|-------------------------------------------------------------|------------------------------------------|-----------------------------------------------------------------------------------------------------------------------------------------------------------------------------------------------------------------------------------------------------------------------------------|
| Usual contraception used in the year before lockdown        | At risk of unplanned pregnancy (n=1,169) | Selected contraceptive method in response to "In the year before the start of the first lockdown (23 March 2020), which of the following did you or a partner use to prevent pregnancy?". Participants selecting more than one method were asked to specify their 'usual' method. |
| Usual contraception used in the year since lockdown started | At risk of unplanned pregnancy (n=1,169) | Selected contraceptive method in response to "Since the start of the first lockdown, which of the following did you or a partner use to prevent pregnancy?". Participants selecting more than one method were asked to specify their 'usual' method.                              |
| Switched contraceptives due to pandemic                     | At risk of unplanned pregnancy (n=1,169) | Reported "I [temporarily/permanently] changed to a different method to prevent pregnancy" in response to "Since the start of the first lockdown, have any of these things happened because of the pandemic?"                                                                      |



|                                                                       |                                                               |                                                                                                                                                                                                            |
|-----------------------------------------------------------------------|---------------------------------------------------------------|------------------------------------------------------------------------------------------------------------------------------------------------------------------------------------------------------------|
| Accessed services successfully                                        | Tried to access a contraceptive service at least once (n=441) | Reported "Services Accessed during lockdown: Contraception services/advice" and did <b>not</b> report "Services tried but failed to access: Contraception services/advice"                                 |
| Faced difficulty accessing services but was able to access in the end | Tried to access a contraceptive service at least once (n=441) | Reported "Services tried but failed to access: Contraception services/advice" and either "I accessed it eventually" or "I used a different service" to question "what happened in the end?"                |
| Unable to access contraceptive services                               | Tried to access a contraceptive service at least once (n=441) | Reported "Services tried but failed to access: Contraception services/advice" and did <b>not</b> report "I accessed it eventually" or "I used a different service" to question "what happened in the end?" |
| Successful use of contraceptive services (odds ratio)                 | All participants (n=1,488)                                    | Reported "Services Accessed during lockdown: Contraception services/advice"                                                                                                                                |
| Barriers accessing contraceptive services (odds ratio)                | All participants (n=1,488)                                    | Reported "Services tried but failed to access: Contraception services/advice"                                                                                                                              |
| Pregnancy in past year                                                | All participants (n=1,488)                                    | Reported "Yes" to "Are you currently pregnant?" or "In the last year" to "When was most recent pregnancy, even if didn't carry the baby to term?"                                                          |
| London Measure of Unplanned Pregnancy (LMUP) score                    | Participants with a pregnancy in last 5 years                 | Questions and scoring detailed at <a href="https://measure.ascody.co.uk/">https://measure.ascody.co.uk/</a>                                                                                                |
| Unplanned pregnancy in past year                                      | All participants with a pregnancy in past year (n=199)        | Reported pregnant in past year and LMUP score <4                                                                                                                                                           |

## Supplementary Table S3: Service access outcomes – results amongst participants who tried to access contraceptive services (n=441)

### Outcome of attempts to access contraceptive services (% (95% CI))

|                                                            | Accessed services successfully | Faced difficulty accessing services but was able to access in the end | Unable to access contraceptive services | Denominators (weighted, unweighted) |
|------------------------------------------------------------|--------------------------------|-----------------------------------------------------------------------|-----------------------------------------|-------------------------------------|
| <b>Total</b>                                               | 83.6 (79.5, 87.1)              | 10.7 (7.9, 14.3)                                                      | 5.7 (3.7, 8.6)                          | 364, 441                            |
| <b>Age</b>                                                 |                                |                                                                       |                                         |                                     |
| 18-24                                                      | 80.8 (70.6, 88.0)              | 14.9 (8.7, 24.6)                                                      | 4.3 (1.5, 11.7)                         | 82, 104                             |
| 25-29                                                      | 83.7 (75.2, 89.7)              | 11.7 (6.7, 19.5)                                                      | 4.6 (1.9, 10.9)                         | 104, 136                            |
| 30-34                                                      | 81.8 (71.1, 89.1)              | 9.2 (4.4, 18.5)                                                       | 9.0 (4.2, 18.2)                         | 74, 89                              |
| 35-44                                                      | 87.1 (79.1, 92.3)              | 7.3 (3.6, 14.2)                                                       | 5.6 (2.5, 12.2)                         | 104, 112                            |
| P-value                                                    |                                |                                                                       |                                         | p=0.51                              |
| <b>Ethnicity</b>                                           |                                |                                                                       |                                         |                                     |
| White                                                      | 83.7 (79.1, 87.4)              | 10.3 (7.4, 14.3)                                                      | 6.0 (3.8, 9.3)                          | 306, 380                            |
| Black or Black African or Black Caribbean or Black British | 93.4 (66.4, 99.0)              | 6.6 (1.0, 33.6)                                                       |                                         | 18, 15                              |
| Asian or Asian British                                     | 73.4 (48.8, 88.9)              | 21.1 (7.8, 45.8)                                                      | 5.5 (0.7, 31.4)                         | 20, 20                              |
| Mixed or multiple or other ethnic groups                   | 84.5 (57.4, 95.7)              | 8.4 (1.4, 36.2)                                                       | 7.1 (1.1, 35.4)                         | 17, 24                              |
| P-value                                                    |                                |                                                                       |                                         | p=0.64                              |
| <b>Self-described sexual identity</b>                      |                                |                                                                       |                                         |                                     |
| Heterosexual or Straight                                   | 84.5 (80.3, 88.0)              | 9.8 (7.1, 13.4)                                                       | 5.7 (3.7, 8.7)                          | 346, 383                            |

**Outcome of attempts to access contraceptive services (% (95% CI))**

|                                 | <b>Accessed services successfully</b> | <b>Faced difficulty accessing services but was able to access in the end</b> | <b>Unable to access contraceptive services</b> | <b>Denominators (weighted, unweighted)</b> |
|---------------------------------|---------------------------------------|------------------------------------------------------------------------------|------------------------------------------------|--------------------------------------------|
| Lesbian, Gay, Bisexual or Other | 70.3 (42.8, 88.3)                     | 22.5 (7.6, 50.7)                                                             | 7.1 (1.0, 37.4)                                | 16, 56                                     |
| P-value                         |                                       |                                                                              |                                                | p=0.047                                    |

**Social Grade**

|                                                |                   |                  |                 |          |
|------------------------------------------------|-------------------|------------------|-----------------|----------|
| A Upper middle class/ B Middle class           | 83.8 (74.5, 90.2) | 13.3 (7.6, 22.2) | 2.9 (0.8, 9.5)  | 89, 117  |
| C1 Lower middle class/C2 Skilled working class | 85.1 (79.1, 89.5) | 8.7 (5.4, 13.7)  | 6.3 (3.5, 10.8) | 187, 211 |
| D Working class/ E Lower level of subsistence  | 80.4 (70.7, 87.5) | 12.2 (6.8, 21.0) | 7.3 (3.4, 15.1) | 88, 113  |
| P-value                                        |                   |                  |                 | p=0.44   |

**Education level**

|                   |                   |                  |                  |          |
|-------------------|-------------------|------------------|------------------|----------|
| Degree            | 85.5 (79.7, 89.8) | 10.7 (7.1, 16.0) | 3.8 (1.8, 7.6)   | 193, 234 |
| Below degree      | 83.1 (76.4, 88.2) | 9.3 (5.7, 15.0)  | 7.6 (4.4, 13.0)  | 159, 192 |
| No qualifications | 60.8 (29.4, 85.2) | 27.6 (8.3, 61.5) | 11.6 (1.7, 49.3) | 12, 15   |
| P-value           |                   |                  |                  | p=0.13   |

**Living together - relationship but not living together - Single**

|                                    |                   |                  |                 |          |
|------------------------------------|-------------------|------------------|-----------------|----------|
| Single                             | 87.8 (75.2, 94.4) | 6.5 (2.1, 17.9)  | 5.8 (1.8, 17.1) | 50, 61   |
| Casual, new, >1, at end or other   | 89.1 (70.7, 96.5) | 6.9 (1.6, 25.0)  | 4.0 (0.6, 22.5) | 29, 36   |
| Married/steady NOT living together | 82.9 (70.0, 90.9) | 11.5 (5.2, 23.5) | 5.7 (1.8, 16.5) | 53, 67   |
| Married/steady and living together | 82.2 (76.7, 86.7) | 11.9 (8.3, 16.7) | 5.9 (3.5, 9.8)  | 231, 277 |
| P-value                            |                   |                  |                 | p=0.88   |

**Outcome of attempts to access contraceptive services (% (95% CI))**

|                                                                   | <b>Accessed services successfully</b> | <b>Faced difficulty accessing services but was able to access in the end</b> | <b>Unable to access contraceptive services</b> | <b>Denominators (weighted, unweighted)</b> |
|-------------------------------------------------------------------|---------------------------------------|------------------------------------------------------------------------------|------------------------------------------------|--------------------------------------------|
| <b>Been furloughed under the Coronavirus Job Retention Scheme</b> |                                       |                                                                              |                                                |                                            |
| No                                                                | 83.6 (79.1, 87.4)                     | 10.5 (7.5, 14.5)                                                             | 5.9 (3.7, 9.1)                                 | 308, 373                                   |
| Yes                                                               | 85.2 (72.7, 92.5)                     | 9.9 (4.2, 21.5)                                                              | 5.0 (1.5, 15.6)                                | 54, 65                                     |
| P-value                                                           |                                       |                                                                              |                                                | p=0.95                                     |
| <b>Became unemployed</b>                                          |                                       |                                                                              |                                                |                                            |
| No                                                                | 83.5 (79.0, 87.2)                     | 10.5 (7.6, 14.4)                                                             | 6.0 (3.9, 9.2)                                 | 322, 390                                   |
| Yes                                                               | 87.1 (72.2, 94.6)                     | 9.4 (3.4, 23.6)                                                              | 3.6 (0.7, 17.1)                                | 40, 48                                     |
| P-value                                                           |                                       |                                                                              |                                                | p=0.79                                     |
| <b>Number of days drinking</b>                                    |                                       |                                                                              |                                                |                                            |
| 0 days                                                            | 82.2 (74.8, 87.7)                     | 11.2 (6.9, 17.7)                                                             | 6.6 (3.5, 12.2)                                | 140, 166                                   |
| 1-2 days                                                          | 84.0 (76.8, 89.3)                     | 9.0 (5.2, 15.1)                                                              | 7.0 (3.8, 12.8)                                | 136, 165                                   |
| 3-4 days                                                          | 84.2 (72.7, 91.4)                     | 13.0 (6.6, 24.1)                                                             | 2.8 (0.6, 11.7)                                | 62, 76                                     |
| 5-7 days                                                          | 88.4 (68.0, 96.5)                     | 10.7 (3.1, 31.1)                                                             | 0.9 (0.0, 41.4)                                | 25, 34                                     |
| P-value                                                           |                                       |                                                                              |                                                | p=0.61                                     |
| <b>Drinking habits compared to pre Covid-19 outbreak</b>          |                                       |                                                                              |                                                |                                            |
| Less these days                                                   | 88.8 (81.3, 93.5)                     | 6.4 (3.0, 12.9)                                                              | 4.8 (2.1, 11.0)                                | 109, 136                                   |
| About the same                                                    | 82.3 (75.7, 87.5)                     | 12.5 (8.2, 18.5)                                                             | 5.2 (2.7, 9.9)                                 | 163, 198                                   |
| More these days                                                   | 80.5 (70.9, 87.5)                     | 11.7 (6.5, 20.3)                                                             | 7.7 (3.7, 15.5)                                | 90, 105                                    |

**Outcome of attempts to access contraceptive services (% (95% CI))**

|                                            | <b>Accessed services successfully</b> | <b>Faced difficulty accessing services but was able to access in the end</b> | <b>Unable to access contraceptive services</b> | <b>Denominators (weighted, unweighted)</b> |
|--------------------------------------------|---------------------------------------|------------------------------------------------------------------------------|------------------------------------------------|--------------------------------------------|
| P-value                                    |                                       |                                                                              |                                                | p=0.39                                     |
| <b>Current smoker</b>                      |                                       |                                                                              |                                                |                                            |
| No                                         | 87.5 (83.0, 91.0)                     | 8.3 (5.5, 12.3)                                                              | 4.2 (2.3, 7.4)                                 | 269, 327                                   |
| Yes                                        | 72.4 (62.5, 80.6)                     | 17.4 (11.0, 26.6)                                                            | 10.1 (5.4, 18.2)                               | 94, 113                                    |
| P-value                                    |                                       |                                                                              |                                                | p=0.0026                                   |
| <b>Symptoms of depression (PHQ2 score)</b> |                                       |                                                                              |                                                |                                            |
| No symptoms of depression (0-2)            | 85.6 (80.2, 89.7)                     | 9.3 (6.1, 14.1)                                                              | 5.1 (2.8, 9.0)                                 | 212, 259                                   |
| Symptoms of depression (3-6)               | 80.5 (73.2, 86.2)                     | 12.6 (8.1, 19.2)                                                             | 6.9 (3.7, 12.4)                                | 145, 174                                   |
| P-value                                    |                                       |                                                                              |                                                | p=0.43                                     |
| <b>Symptoms of anxiety (GAD2 score)</b>    |                                       |                                                                              |                                                |                                            |
| No symptoms of anxiety (0-2)               | 87.1 (81.7, 91.1)                     | 8.2 (5.1, 12.9)                                                              | 4.6 (2.4, 8.6)                                 | 202, 235                                   |
| Symptoms of anxiety (3-6)                  | 78.9 (71.8, 84.6)                     | 13.9 (9.3, 20.3)                                                             | 7.2 (4.0, 12.4)                                | 159, 203                                   |
| P-value                                    |                                       |                                                                              |                                                | p=0.11                                     |

## Supplementary Table S4: Stopping or switching contraception because of the pandemic – all participants at risk of unplanned pregnancy who used contraception before Covid

### Stopped or switched contraceptive methods (% (95% CI))

|                                                            | Stopped using<br>contraceptives | Switched<br>more > less<br>effective | Switched -<br>less > less<br>effective | Switched -<br>more > more<br>effective | Switched<br>less ><br>more<br>effective | Did not<br>switch or stop<br>usual method | Denominators<br>(weighted,<br>unweighted) |
|------------------------------------------------------------|---------------------------------|--------------------------------------|----------------------------------------|----------------------------------------|-----------------------------------------|-------------------------------------------|-------------------------------------------|
| <b>Total</b>                                               | 3.6 (2.5, 5.1)                  | 2.1 (1.3, 3.3)                       | 4.1 (3.0, 5.8)                         | 6.6 (5.0, 8.5)                         | 0.7 (0.3, 1.6)                          | 82.9 (80.2, 85.4)                         | 811, 957                                  |
| <b>Age</b>                                                 |                                 |                                      |                                        |                                        |                                         |                                           |                                           |
| 18-24                                                      | 2.6 (0.9, 7.0)                  | 4.1 (1.8, 9.0)                       | 10.7 (6.5, 16.9)                       | 8.5 (4.9, 14.4)                        | 1.4 (0.4, 5.5)                          | 72.7 (64.7, 79.4)                         | 143, 182                                  |
| 25-29                                                      | 5.1 (2.8, 9.1)                  | 2.7 (1.2, 6.1)                       | 2.1 (0.8, 5.3)                         | 6.4 (3.8, 10.6)                        | 0.4 (0.1, 3.4)                          | 83.2 (77.5, 87.7)                         | 209, 261                                  |
| 30-34                                                      | 3.5 (1.6, 7.5)                  | 1.8 (0.6, 5.4)                       | 3.4 (1.5, 7.3)                         | 7.9 (4.7, 12.9)                        | 1.0 (0.2, 4.3)                          | 82.4 (76.1, 87.4)                         | 176, 210                                  |
| 35-44                                                      | 3.0 (1.5, 5.8)                  | 0.7 (0.2, 2.8)                       | 2.8 (1.4, 5.6)                         | 4.9 (2.9, 8.1)                         | 0.5 (0.1, 2.6)                          | 88.2 (83.8, 91.5)                         | 283, 304                                  |
| P-value                                                    |                                 |                                      |                                        |                                        |                                         |                                           | p=0.0020                                  |
| <b>Ethnicity</b>                                           |                                 |                                      |                                        |                                        |                                         |                                           |                                           |
| White                                                      | 3.5 (2.4, 5.2)                  | 1.9 (1.1, 3.3)                       | 3.1 (2.0, 4.7)                         | 6.1 (4.6, 8.1)                         | 0.8 (0.4, 1.9)                          | 84.5 (81.6, 87.0)                         | 707, 857                                  |
| Black or Black African or Black Caribbean or Black British | 10.0 (2.8, 30.1)                |                                      | 16.7 (6.3, 37.4)                       | 13.1 (4.3, 33.5)                       |                                         | 60.2 (39.7, 77.6)                         | 26, 20                                    |
| Asian or Asian British                                     | 2.5 (0.4, 15.4)                 | 3.4 (0.6, 16.0)                      | 6.3 (1.9, 19.1)                        | 5.3 (1.4, 18.0)                        |                                         | 82.6 (67.9, 91.4)                         | 43, 39                                    |

**Stopped or switched contraceptive methods (% (95% CI))**

|                                          | <b>Stopped using<br/>contraceptives</b> | <b>Switched<br/>more &gt; less<br/>effective</b> | <b>Switched -<br/>less &gt; less<br/>effective</b> | <b>Switched -<br/>more &gt; more<br/>effective</b> | <b>Switched<br/>less &gt;<br/>more<br/>effective</b> | <b>Did not<br/>switch or stop<br/>usual method</b> | <b>Denominators<br/>(weighted,<br/>unweighted)</b> |
|------------------------------------------|-----------------------------------------|--------------------------------------------------|----------------------------------------------------|----------------------------------------------------|------------------------------------------------------|----------------------------------------------------|----------------------------------------------------|
| Mixed or multiple or other ethnic groups | 1.3 (0.0, 25.2)                         | 5.0 (1.0,<br>21.9)                               | 15.4 (6.2,<br>33.4)                                | 8.8 (2.6,<br>26.0)                                 |                                                      | 69.6 (50.8,<br>83.5)                               | 31, 39                                             |
| P-value                                  |                                         |                                                  |                                                    |                                                    |                                                      |                                                    | p=0.0073                                           |

**Self-described sexual identity**

|                                 |                 |                    |                    |                     |                    |                      |          |
|---------------------------------|-----------------|--------------------|--------------------|---------------------|--------------------|----------------------|----------|
| Heterosexual or Straight        | 3.5 (2.4, 5.1)  | 2.0 (1.2,<br>3.3)  | 4.0 (2.9,<br>5.7)  | 6.3 (4.8, 8.2)      | 0.7 (0.3,<br>1.7)  | 83.4 (80.6,<br>85.9) | 771, 844 |
| Lesbian, Gay, Bisexual or Other | 5.9 (1.2, 23.9) | 4.4 (0.7,<br>22.7) | 4.5 (0.8,<br>22.8) | 15.0 (5.7,<br>33.8) | 0.9 (0.0,<br>34.0) | 69.3 (49.8,<br>83.7) | 29, 104  |
| P-value                         |                 |                    |                    |                     |                    |                      | p=0.015  |

**Social Grade**

|                                                                                                              |                |                   |                    |                    |                   |                      |          |
|--------------------------------------------------------------------------------------------------------------|----------------|-------------------|--------------------|--------------------|-------------------|----------------------|----------|
| A/B - Higher/intermediate managerial, administrative and professional                                        | 2.8 (1.2, 6.2) | 3.3 (1.5,<br>6.9) | 2.7 (1.1,<br>6.1)  | 8.0 (5.0,<br>12.7) | 0.4 (0.1,<br>3.5) | 82.8 (76.9,<br>87.4) | 200, 251 |
| C1/C2 - Supervisory, clerical and junior managerial, administrative and professional, skilled manual workers | 4.4 (2.8, 6.8) | 1.5 (0.7,<br>3.1) | 3.0 (1.8,<br>5.1)  | 6.2 (4.3, 8.8)     | 0.6 (0.2,<br>1.9) | 84.4 (80.7,<br>87.5) | 441, 496 |
| D/E - Semi-skilled and unskilled manual, casual, lowest grade and unemployed                                 | 2.5 (0.9, 6.3) | 2.1 (0.8,<br>5.9) | 8.8 (5.4,<br>14.2) | 5.8 (3.1,<br>10.6) | 1.6 (0.5,<br>5.1) | 79.2 (72.4,<br>84.7) | 169, 210 |
| P-value                                                                                                      |                |                   |                    |                    |                   |                      | p=0.020  |

**Education level**

|              |                |                   |                   |                    |                   |                      |          |
|--------------|----------------|-------------------|-------------------|--------------------|-------------------|----------------------|----------|
| Degree       | 3.4 (2.1, 5.6) | 1.9 (1.0,<br>3.7) | 3.5 (2.1,<br>5.7) | 5.5 (3.7, 8.1)     | 1.0 (0.4,<br>2.5) | 84.6 (81.0,<br>87.7) | 444, 529 |
| Below degree | 3.8 (2.2, 6.4) | 2.3 (1.2,<br>4.6) | 5.2 (3.3,<br>8.1) | 7.6 (5.2,<br>10.9) | 0.2 (0.0,<br>2.0) | 80.9 (76.4,<br>84.7) | 349, 408 |

**Stopped or switched contraceptive methods (% (95% CI))**

|                   | <b>Stopped using<br/>contraceptives</b> | <b>Switched<br/>more &gt; less<br/>effective</b> | <b>Switched -<br/>less &gt; less<br/>effective</b> | <b>Switched -<br/>more &gt; more<br/>effective</b> | <b>Switched<br/>less &gt;<br/>more<br/>effective</b> | <b>Did not<br/>switch or stop<br/>usual method</b> | <b>Denominators<br/>(weighted,<br/>unweighted)</b> |
|-------------------|-----------------------------------------|--------------------------------------------------|----------------------------------------------------|----------------------------------------------------|------------------------------------------------------|----------------------------------------------------|----------------------------------------------------|
| No qualifications | 2.6 (0.1, 39.0)                         |                                                  |                                                    | 12.9 (3.2,<br>40.2)                                | 5.0 (0.5,<br>35.0)                                   | 79.4 (52.4,<br>93.1)                               | 17, 20                                             |
| P-value           |                                         |                                                  |                                                    |                                                    |                                                      |                                                    | p=0.21                                             |

**Living together - relationship but not living together - Single**

|                                    |                 |                    |                     |                    |                    |                      |          |
|------------------------------------|-----------------|--------------------|---------------------|--------------------|--------------------|----------------------|----------|
| Married/steady and living together | 3.8 (2.5, 5.8)  | 1.2 (0.5,<br>2.5)  | 3.7 (2.4,<br>5.6)   | 6.1 (4.3, 8.4)     | 0.8 (0.3,<br>2.0)  | 84.5 (81.2,<br>87.3) | 547, 638 |
| Married/steady NOT living together | 4.0 (1.6, 9.6)  | 3.9 (1.5,<br>9.5)  | 3.9 (1.5,<br>9.5)   | 8.3 (4.4,<br>15.0) |                    | 80.0 (71.6,<br>86.4) | 115, 142 |
| Casual, new, >1, at end or other   | 0.7 (0.0, 14.5) | 4.9 (1.5,<br>14.8) | 10.2 (4.5,<br>21.4) | 4.5 (1.3,<br>14.4) | 1.4 (0.2,<br>11.8) | 78.3 (65.6,<br>87.3) | 58, 68   |
| Single                             | 3.7 (1.3, 10.3) | 3.3 (1.1,<br>9.8)  | 3.4 (1.1,<br>10.0)  | 8.6 (4.3,<br>16.5) | 0.9 (0.1,<br>7.6)  | 80.1 (70.6,<br>87.2) | 91, 109  |
| P-value                            |                 |                    |                     |                    |                    |                      | p=0.20   |

**Been furloughed under the Coronavirus Job Retention Scheme**

|         |                 |                   |                   |                |                   |                      |          |
|---------|-----------------|-------------------|-------------------|----------------|-------------------|----------------------|----------|
| No      | 3.1 (2.0, 4.7)  | 2.3 (1.4,<br>3.7) | 4.2 (2.9,<br>6.1) | 7.3 (5.5, 9.5) | 0.5 (0.2,<br>1.5) | 82.7 (79.6,<br>85.4) | 656, 775 |
| Yes     | 5.9 (3.1, 11.1) | 1.1 (0.2,<br>4.9) | 4.0 (1.8,<br>8.7) | 3.6 (1.6, 8.2) | 1.8 (0.6,<br>5.9) | 83.5 (76.7,<br>88.7) | 150, 177 |
| P-value |                 |                   |                   |                |                   |                      | p=0.072  |

**Became unemployed**

|    |                |                   |                   |                |                   |                      |          |
|----|----------------|-------------------|-------------------|----------------|-------------------|----------------------|----------|
| No | 3.4 (2.3, 4.9) | 2.1 (1.3,<br>3.5) | 4.0 (2.8,<br>5.7) | 6.4 (4.8, 8.4) | 0.7 (0.3,<br>1.7) | 83.4 (80.5,<br>86.0) | 726, 852 |
|----|----------------|-------------------|-------------------|----------------|-------------------|----------------------|----------|



**Stopped or switched contraceptive methods (% (95% CI))**

|         | <b>Stopped using<br/>contraceptives</b> | <b>Switched<br/>more &gt; less<br/>effective</b> | <b>Switched -<br/>less &gt; less<br/>effective</b> | <b>Switched -<br/>more &gt; more<br/>effective</b> | <b>Switched<br/>less &gt;<br/>more<br/>effective</b> | <b>Did not<br/>switch or stop<br/>usual method</b> | <b>Denominators<br/>(weighted,<br/>unweighted)</b> |
|---------|-----------------------------------------|--------------------------------------------------|----------------------------------------------------|----------------------------------------------------|------------------------------------------------------|----------------------------------------------------|----------------------------------------------------|
| Yes     | 5.9 (2.4, 13.8)                         | 1.2 (0.2,<br>8.5)                                | 5.7 (2.3,<br>13.6)                                 | 8.6 (4.1,<br>17.2)                                 | 1.1 (0.1,<br>8.6)                                    | 77.5 (67.0,<br>85.5)                               | 80, 100                                            |
| P-value |                                         |                                                  |                                                    |                                                    |                                                      |                                                    | p=0.61                                             |

**Number of days drinking in past week**

|          |                 |                    |                     |                    |                   |                      |          |
|----------|-----------------|--------------------|---------------------|--------------------|-------------------|----------------------|----------|
| 0 days   | 4.2 (2.5, 7.0)  | 2.4 (1.2,<br>4.8)  | 2.1 (1.0,<br>4.4)   | 6.6 (4.3, 9.9)     | 0.3 (0.0,<br>2.2) | 84.5 (80.1,<br>88.0) | 321, 375 |
| 1-2 days | 3.4 (1.9, 5.9)  | 1.6 (0.7,<br>3.7)  | 3.8 (2.2,<br>6.4)   | 7.3 (4.9,<br>10.6) | 0.8 (0.2,<br>2.6) | 83.2 (78.8,<br>86.9) | 334, 399 |
| 3-4 days | 2.1 (0.5, 7.5)  | 2.5 (0.7,<br>8.0)  | 8.6 (4.5,<br>15.7)  | 5.5 (2.4,<br>11.8) | 2.5 (0.7,<br>8.0) | 78.9 (70.1,<br>85.7) | 107, 121 |
| 5-7 days | 4.6 (1.2, 16.5) | 2.1 (0.3,<br>14.4) | 11.4 (4.8,<br>24.5) | 3.7 (0.8,<br>15.5) |                   | 78.2 (63.8,<br>88.0) | 47, 60   |
| P-value  |                 |                    |                     |                    |                   |                      | p=0.038  |

**Drinking habits compared to pre Covid-19 outbreak**

|                 |                |                   |                    |                    |                   |                      |          |
|-----------------|----------------|-------------------|--------------------|--------------------|-------------------|----------------------|----------|
| Less these days | 2.9 (1.4, 6.0) | 3.0 (1.5,<br>6.2) | 3.8 (2.0,<br>7.1)  | 7.5 (4.7,<br>11.6) | 1.4 (0.5,<br>4.0) | 81.4 (75.9,<br>85.9) | 239, 294 |
| About the same  | 4.2 (2.6, 6.6) | 1.5 (0.7,<br>3.2) | 3.5 (2.1,<br>5.8)  | 5.8 (4.0, 8.5)     | 0.2 (0.0,<br>1.7) | 84.8 (81.0,<br>87.9) | 421, 488 |
| More these days | 3.1 (1.2, 7.7) | 2.3 (0.8,<br>6.6) | 6.6 (3.5,<br>12.0) | 7.5 (4.1,<br>13.1) | 1.2 (0.3,<br>5.2) | 79.3 (71.9,<br>85.2) | 144, 168 |
| P-value         |                |                   |                    |                    |                   |                      | p=0.42   |

**Current smoker**

**Stopped or switched contraceptive methods (% (95% CI))**

|         | <b>Stopped using<br/>contraceptives</b> | <b>Switched<br/>more &gt; less<br/>effective</b> | <b>Switched -<br/>less &gt; less<br/>effective</b> | <b>Switched -<br/>more &gt; more<br/>effective</b> | <b>Switched<br/>less &gt;<br/>more<br/>effective</b> | <b>Did not<br/>switch or stop<br/>usual method</b> | <b>Denominators<br/>(weighted,<br/>unweighted)</b> |
|---------|-----------------------------------------|--------------------------------------------------|----------------------------------------------------|----------------------------------------------------|------------------------------------------------------|----------------------------------------------------|----------------------------------------------------|
| No      | 3.5 (2.3, 5.3)                          | 1.8 (1.0, 3.2)                                   | 3.2 (2.1, 4.9)                                     | 6.4 (4.7, 8.6)                                     | 0.8 (0.3, 1.9)                                       | 84.2 (81.2, 86.9)                                  | 636, 752                                           |
| Yes     | 3.8 (1.8, 8.0)                          | 3.0 (1.3, 7.0)                                   | 7.6 (4.4, 12.6)                                    | 7.2 (4.2, 12.2)                                    | 0.5 (0.1, 4.1)                                       | 77.9 (71.0, 83.5)                                  | 173, 203                                           |
| P-value |                                         |                                                  |                                                    |                                                    |                                                      |                                                    | p=0.11                                             |

**Symptoms of depression (PHQ2 score)**

|                                 |                |                |                 |                 |                |                   |           |
|---------------------------------|----------------|----------------|-----------------|-----------------|----------------|-------------------|-----------|
| No symptoms of depression (0-2) | 4.0 (2.6, 6.0) | 1.5 (0.8, 3.0) | 2.5 (1.5, 4.2)  | 4.9 (3.4, 7.1)  | 0.6 (0.2, 1.7) | 86.5 (83.3, 89.1) | 536, 628  |
| Symptoms of depression (3-6)    | 2.8 (1.4, 5.7) | 3.2 (1.6, 6.1) | 6.9 (4.4, 10.7) | 9.3 (6.4, 13.5) | 0.8 (0.2, 3.0) | 76.9 (71.4, 81.6) | 266, 319  |
| P-value                         |                |                |                 |                 |                |                   | p=0.00086 |

**Symptoms of anxiety (GAD2 score)**

|                              |                |                |                |                 |                |                   |          |
|------------------------------|----------------|----------------|----------------|-----------------|----------------|-------------------|----------|
| No symptoms of anxiety (0-2) | 3.8 (2.4, 5.9) | 1.8 (0.9, 3.4) | 2.6 (1.5, 4.5) | 6.6 (4.7, 9.1)  | 0.8 (0.3, 2.1) | 84.4 (81.0, 87.3) | 507, 584 |
| Symptoms of anxiety (3-6)    | 3.3 (1.8, 6.1) | 2.3 (1.1, 4.8) | 6.0 (3.8, 9.3) | 6.6 (4.3, 10.1) | 0.7 (0.2, 2.7) | 81.1 (76.2, 85.2) | 298, 367 |
| P-value                      |                |                |                |                 |                |                   | p=0.26   |

246 respondents (17.4% of total) answered 'Not applicable' to questions of usual contraception used as they were already pregnant, planning to get pregnant or unable to get pregnant. 142 respondents (9.5%) answered 'no method used' in the year before lockdown. These responses are excluded from the table.
